# Supplementary material for: Radar observations of winds, waves and tides in the mesosphere and lower thermosphere over South Georgia island (54°S, 36°W) and comparison to WACCM simulations
Source: Copernicus journal article supplement (doi:10.5194/acp-2021-981), 2021-12-09

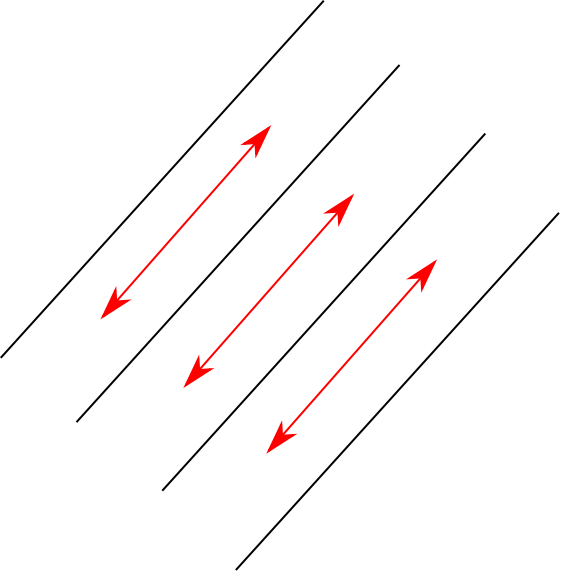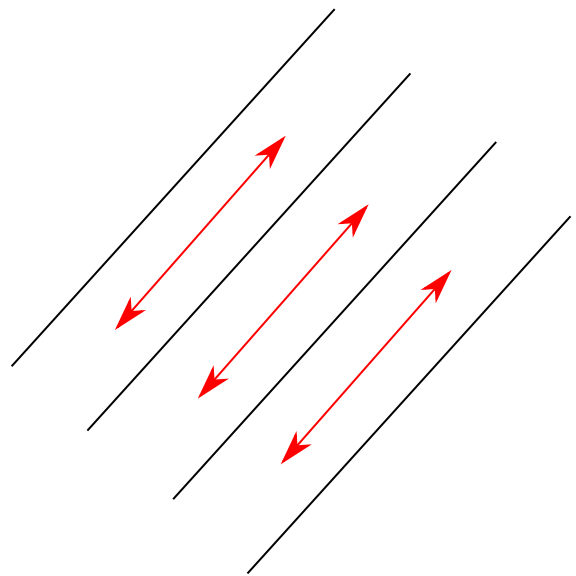

Radar

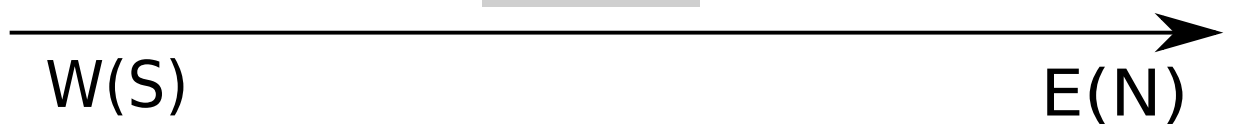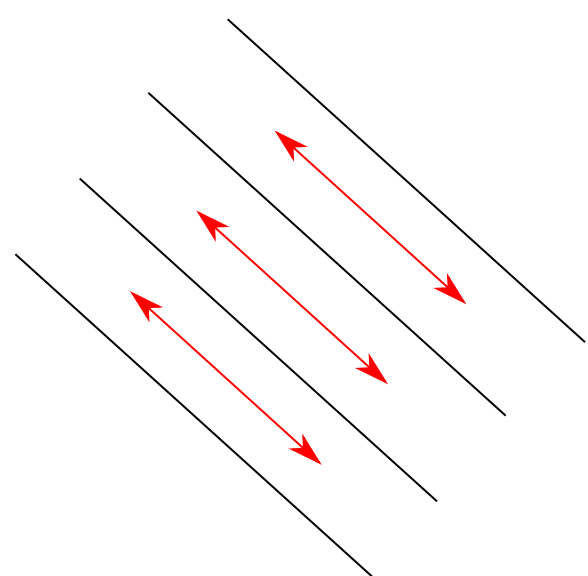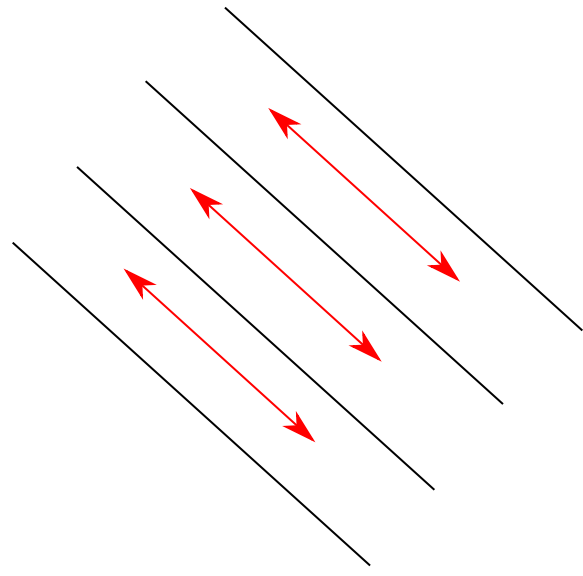

Radar

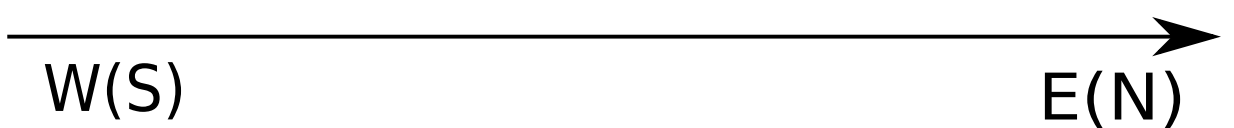

Supplement: Supplementary file [file acp-2021-981-RC4-supplement.pdf]
